# Supplementary material
Source: PubMed Central journal article supplement (PMC123671)
Supplement: pnas_012025199_1.pdf [file pnas_012025199_1.pdf]

| Max Tissue | Affy Probe ID | Symbol       | Description                                                                                      | Accession # |
|------------|---------------|--------------|--------------------------------------------------------------------------------------------------|-------------|
| Testis     | 31735_at      | I-4          | type 1 protein phosphatase inhibitor                                                             | NM_025210   |
| Testis     | 31954_f_at    | GAGE3        | G antigen 3                                                                                      | NM_001473   |
| Testis     | 32483_at      | none         | ESTs                                                                                             | Hs.116840   |
| Testis     | 32993_s_at    | BLu          | BLu protein                                                                                      | NM_015896   |
| Testis     | 33655_f_at    | SSX3         | synovial sarcoma, X breakpoint 3                                                                 | NM_021014   |
| Testis     | 34567_at      | CYLC2        | cylicin, basic protein of sperm head cytoskeleton 2                                              | NM_001340   |
| Testis     | 35022_at      | SOX5         | SRY (sex determining region Y)-box 5                                                             | NM_006940   |
| Testis     | 35512_at      | none         | Homo sapiens chromosome 19, cosmid R31343                                                        | Hs.126496   |
| Testis     | 35515_at      | TEKT2        | tektin 2 (testicular)                                                                            | NM_014466   |
| Testis     | 35549_at      | none         | Homo sapiens ribosomal protein L39 mRNA, complete cds                                            | Hs.132748   |
| Testis     | 36409_f_at    | SSX2         | synovial sarcoma, X breakpoint 2                                                                 | NM_003147   |
| Testis     | 32298_at      | ADAM2        | a disintegrin and metalloproteinase domain 2 (fertilin beta)                                     | NM_001464   |
| Testis     | 33572_at      | ZNF165       | zinc finger protein 165                                                                          | NM_003447   |
| Testis     | 33971_f_at    | DAZL         | deleted in azoospermia-like                                                                      | NM_001351   |
| Testis     | 33972_r_at    | DAZL         | deleted in azoospermia-like                                                                      | NM_001351   |
| Testis     | 34044_at      | HSF2BP       | heat shock transcription factor 2 binding protein                                                | NM_007031   |
| Testis     | 34048_at      | none         | H.sapiens mRNA for glycerol kinase testis specific 2                                             | Hs.98008    |
| Testis     | 34053_at      | ZPBP         | zona pellucida binding protein                                                                   | NM_007009   |
| Testis     | 34437_at      | TULP2        | tubby like protein 2                                                                             | NM_003323   |
| Testis     | 34451_at      | LOC51678     | MAGUK protein p55T; Protein Associated with Lins 2                                               | NM_016447   |
| Testis     | 34461_at      | SYCP1        | synaptonemal complex protein 1                                                                   | NM_003176   |
| Testis     | 34511_s_at    | DKFZP434B204 | DKFZP434B204 protein                                                                             | none        |
| Testis     | 35487_at      | BRDT         | bromodomain, testis-specific                                                                     | NM_001726   |
| Testis     | 35901_at      | PIWIL1       | piwi (Drosophila)-like 1                                                                         | none        |
| Testis     | 35922_at      | SYCP2        | synaptonemal complex protein 2                                                                   | NM_014258   |
| Testis     | 35929_s_at    | TSPYQ1       | TSPYq1                                                                                           | NM_022573   |
| Testis     | 36710_at      | CAMP         | cathelicidin antimicrobial peptide                                                               | NM_004345   |
| Testis     | 37128_at      | NAP4         | Nck, Ash and phospholipase C binding protein                                                     | none        |
| Testis     | 37436_at      | MCSF         | mitochondrial capsule selenoprotein                                                              | NM_030663   |
| Testis     | 37474_at      | OIP5         | Opa-interacting protein 5                                                                        | none        |
| Testis     | 37525_at      | SPINLW1      | serine protease inhibitor-like, with Kunitz and WAP domains 1 (eppin)                            | NM_020398   |
| Testis     | 37836_at      | KIAA0998     | KIAA0998 protein                                                                                 | NM_015072   |
| Testis     | 38130_s_at    | GK           | glycerol kinase                                                                                  | NM_000167   |
| Testis     | 38192_at      | KIAA0643     | KIAA0643 protein                                                                                 | NM_024793   |
| Testis     | 38494_at      | ACRV1        | acrosomal vesicle protein 1                                                                      | NM_001612   |
| Testis     | 38525_at      | STAM2        | signal transducing adaptor molecule (SH3 domain and ITAM motif) 2                                | NM_005843   |
| Testis     | 38579_at      | R30953_1     | hypothetical protein R30953_1                                                                    | NM_019612   |
| Testis     | 38873_at      | KIAA0800     | KIAA0800 gene product                                                                            | NM_014703   |
| Testis     | 38905_at      | PRKAR2A      | protein kinase, cAMP-dependent, regulatory, type II, alpha                                       | NM_004157   |
| Testis     | 39662_s_at    | GPRK2L       | G protein-coupled receptor kinase 2 (Drosophila)-like                                            | NM_005307   |
| Testis     | 40361_at      | CCT6B        | chaperonin containing TCP1, subunit 6B (zeta 2)                                                  | NM_006584   |
| Testis     | 40692_at      | TLE4         | transducin-like enhancer of split 4, homolog of Drosophila E(sp1)                                | none        |
| Testis     | 41081_at      | BUB1         | budding uninhibited by benzimidazoles 1 (yeast homolog)                                          | NM_004336   |
| Testis     | 41461_at      | PMS1         | postmeiotic segregation increased (S. cerevisiae) 1                                              | NM_000534   |
| Testis     | 41639_at      | KIAA0074     | KIAA0074 protein                                                                                 | none        |
| Testis     | 31840_at      | IDE          | insulin-degrading enzyme                                                                         | NM_004969   |
| Testis     | 31865_at      | ASK          | activator of S phase kinase                                                                      | NM_006716   |
| Testis     | 32118_at      | RAD17        | RAD17 (S. pombe) homolog                                                                         | NM_002873   |
| Testis     | 33330_at      | CLTCL1       | clathrin, heavy polypeptide-like 1                                                               | NM_001835   |
| Testis     | 33745_at      | PHKG2        | phosphorylase kinase, gamma 2 (testis)                                                           | NM_000294   |
| Testis     | 33773_at      | MLLT10       | myeloid/lymphoid or mixed-lineage leukemia (trithorax (Drosophila) homolog); translocated to, 10 | NM_004641   |
| Testis     | 34220_at      | DKFZP434L243 | DKFZP434L243 protein                                                                             | none        |
| Testis     | 34659_at      | NUP155       | nucleoporin 155kD                                                                                | NM_004298   |
| Testis     | 34736_at      | CCNB1        | cyclin B1                                                                                        | NM_031966   |
| Testis     | 35134_at      | ART3         | ADP-ribosyltransferase 3                                                                         | NM_001179   |

| Max Tissue | Affy Probe ID | Symbol   | Description                                                                                                     | Accession # |
|------------|---------------|----------|-----------------------------------------------------------------------------------------------------------------|-------------|
| Testis     | 35136_at      | P15-2    | hypothetical protein P15-2                                                                                      | NM_018698   |
| Testis     | 35699_at      | BUB1B    | budding uninhibited by benzimidazoles 1 (yeast homolog), beta                                                   | NM_001211   |
| Testis     | 36088_at      | DSCR2    | Down syndrome critical region gene 2                                                                            | NM_003720   |
| Testis     | 36837_at      | KNSL6    | kinesin-like 6 (mitotic centromere-associated kinesin)                                                          | NM_006845   |
| Testis     | 36863_at      | HMMR     | hyaluronan-mediated motility receptor (RHAMM)                                                                   | NM_012484   |
| Testis     | 36901_at      | TMF1     | TATA element modulatory factor 1                                                                                | NM_007114   |
| Testis     | 38007_at      | NF2      | neurofibromin 2 (bilateral acoustic neuroma)                                                                    | NM_000268   |
| Testis     | 38349_at      | ITCH     | itchy (mouse homolog) E3 ubiquitin protein ligase                                                               | NM_031483   |
| Testis     | 41781_at      | PPFIA1   | protein tyrosine phosphatase, receptor type, f polypeptide (PTPRF), interacting protein (liprin), alpha 1       | NM_003626   |
| Testis     | 32263_at      | CCNB2    | cyclin B2                                                                                                       | NM_004701   |
| Testis     | 34851_at      | STK6     | serine/threonine kinase 6                                                                                       | NM_003158   |
| Testis     | 37305_at      | EZH2     | enhancer of zeste (Drosophila) homolog 2                                                                        | NM_004456   |
| Testis     | 38834_at      | TOPBP1   | topoisomerase (DNA) II binding protein                                                                          | NM_007027   |
| Testis     | 39153_r_at    | COIL     | coilin                                                                                                          | NM_004645   |
| Testis     | 39156_at      | none     | AL021937:dJ149A16.3 (Ret finger protein-like 3 antisense) /cds=(59  GenBank==AL021937                           |             |
| Testis     | 39805_at      | ABCB6    | ATP-binding cassette, sub-family B (MDR/TAP), member 6                                                          | NM_005689   |
| Testis     | 39871_at      | HNRNPG-T | testes-specific heterogenous nuclear ribonucleoprotein G-T                                                      | NM_014469   |
| Testis     | 39894_f_at    | BRD1     | bromodomain-containing 1                                                                                        | NM_014577   |
| Testis     | 33139_s_at    | MLF1     | myeloid leukemia factor 1                                                                                       | NM_022443   |
| Testis     | 1945_at       | CCNB1    | cyclin B1                                                                                                       | NM_031966   |
| Testis     | 1803_at       | CDC2     | cell division cycle 2, G1 to S and G2 to M                                                                      | NM_001786   |
| Testis     | 1654_at       | BRAF     | v-raf murine sarcoma viral oncogene homolog B1                                                                  | NM_004333   |
| Testis     | 1599_at       | CDKN3    | cyclin-dependent kinase inhibitor 3 (CDK2-associated dual specificity phosphatase)                              | NM_005192   |
| Testis     | 1055_g_at     | RFC4     | replication factor C (activator 1) 4 (37kD)                                                                     | NM_002916   |
| Testis     | 572_at        | TTK      | TTK protein kinase                                                                                              | NM_003318   |
| Testis     | 366_s_at      | NEK2     | NIMA (never in mitosis gene a)-related kinase 2                                                                 | NM_002497   |
| Testis     | 267_at        | FRAP1    | FK506 binding protein 12-rapamycin associated protein 1                                                         | NM_004958   |
| Testis     | 157_at        | PRAME    | preferentially expressed antigen in melanoma                                                                    | NM_006115   |
| Testis     | 116_at        | PRKAR2A  | protein kinase, cAMP-dependent, regulatory, type II, alpha                                                      | NM_004157   |
| Testis     | 126_s_at      | SSX2     | synovial sarcoma, X breakpoint 2                                                                                | NM_003147   |
| Pancreas   | 31337_at      | GNRH2    | gonadotropin-releasing hormone 2                                                                                | NM_001501   |
| Pancreas   | 31392_r_at    | C1orf1   | chromosome 1 open reading frame 1                                                                               | NM_001213   |
| Pancreas   | 31394_at      | SERPINI2 | serine (or cysteine) proteinase inhibitor, clade I (neuroserpin), member 2                                      | NM_006217   |
| Pancreas   | 31482_at      | CELL     | carboxyl ester lipase-like (bile salt-stimulated lipase-like)                                                   | NM_001808   |
| Pancreas   | 31644_at      | SCYA27   | small inducible cytokine subfamily A (Cys-Cys), member 27                                                       | NM_006664   |
| Pancreas   | 31779_s_at    | PRDM1    | PR domain containing 1, with ZNF domain                                                                         | NM_001198   |
| Pancreas   | 31912_at      | FOXH1    | forkhead box H1                                                                                                 | NM_003923   |
| Pancreas   | 32396_f_at    | ERCC2    | excision repair cross-complementing rodent repair deficiency, complementation group 2 (xeroderma pigmentosum D) | none        |
| Pancreas   | 32399_at      | EVI1     | ecotropic viral integration site 1                                                                              | none        |
| Pancreas   | 32424_at      | HAS1     | hyaluronan synthase 1                                                                                           | NM_001523   |
| Pancreas   | 33603_at      | ABCD1    | ATP-binding cassette, sub-family D (ALD), member 1                                                              | NM_000033   |
| Pancreas   | 33617_s_at    | ZNF46    | zinc finger protein 46 (KUP)                                                                                    | NM_006977   |
| Pancreas   | 33682_at      | GPR1     | G protein-coupled receptor 1                                                                                    | NM_005279   |
| Pancreas   | 34064_s_at    | LY95     | lymphocyte antigen 95 (activating NK-receptor; NK-p44)                                                          | NM_004828   |
| Pancreas   | 34096_at      | KIAA0912 | KIAA0912 protein                                                                                                | none        |
| Pancreas   | 35594_at      | PNLIPRP2 | pancreatic lipase-related protein 2                                                                             | NM_005396   |
| Pancreas   | 32343_at      | none     | J03796:Human erythroid isoform protein 4.1 mRNA  GenBank==J03796                                                |             |
| Pancreas   | 34485_r_at    | BIG2     | brefeldin A-inhibited guanine nucleotide-exchange protein 2                                                     | NM_006420   |
| Pancreas   | 34502_g_at    | RUNX2    | runt-related transcription factor 2                                                                             | NM_004348   |
| Pancreas   | 34525_at      | TCL1B    | T-cell leukemia/lymphoma 1B                                                                                     | NM_004918   |
| Pancreas   | 34953_i_at    | PDE5A    | phosphodiesterase 5A, cGMP-specific                                                                             | NM_001083   |
| Pancreas   | 35458_r_at    | ABCB10   | ATP-binding cassette, sub-family B (MDR/TAP), member 10                                                         | NM_012089   |

| Max Tissue | Affy Probe ID | Symbol        | Description                                                                                       | Accession # |
|------------|---------------|---------------|---------------------------------------------------------------------------------------------------|-------------|
| Pancreas   | 35489_at      | MEP1A         | mepirin A, alpha (PABA peptide hydrolase)                                                         | NM_005588   |
| Pancreas   | 35932_at      | LEFTB         | left-right determination, factor B                                                                | NM_020997   |
| Pancreas   | 36315_i_at    | SEC15B        | Sec15B protein                                                                                    | none        |
| Pancreas   | 37871_at      | IAPP          | islet amyloid polypeptide                                                                         | NM_000415   |
| Pancreas   | 38159_at      | none          | Homo sapiens clone 24540 mRNA sequence                                                            | Hs.153529   |
| Pancreas   | 38185_at      | PAX2          | paired box gene 2                                                                                 | NM_000278   |
| Pancreas   | 38235_at      | ARHGEF15      | Rho guanine exchange factor (GEF) 15                                                              | NM_014958   |
| Pancreas   | 38591_at      | PMS2L5        | postmeiotic segregation increased 2-like 5                                                        | none        |
| Pancreas   | 40021_at      | KCND1         | potassium voltage-gated channel, Shal-related subfamily, member 1                                 | NM_004979   |
| Pancreas   | 40372_at      | PNLIPRP1      | pancreatic lipase-related protein 1                                                               | NM_006229   |
| Pancreas   | 40689_at      | SEL1L         | sel-1 (suppressor of lin-12, C.elegans)-like                                                      | NM_005065   |
| Pancreas   | 40711_at      | none          | Homo sapiens mRNA; cDNA DKFZp564P056 (from clone DKFZp564P056)                                    | Hs.86405    |
| Pancreas   | 40714_at      | CTRC          | chymotrypsin C (caldecrin)                                                                        | NM_007272   |
| Pancreas   | 40748_at      | CPA2          | carboxypeptidase A2 (pancreatic)                                                                  | NM_001869   |
| Pancreas   | 41006_at      | none          | Human clone 23614 mRNA sequence                                                                   | Hs.91375    |
| Pancreas   | 32627_at      | RANBP6        | RAN binding protein 6                                                                             | none        |
| Pancreas   | 33246_at      | MAPK13        | mitogen-activated protein kinase 13                                                               | NM_002754   |
| Pancreas   | 38343_at      | KIAA0328      | KIAA0328 protein                                                                                  | none        |
| Pancreas   | 39726_at      | GCG           | glucagon                                                                                          | NM_002054   |
| Pancreas   | 32797_at      | TRB@          | T cell receptor beta locus                                                                        | none        |
| Pancreas   | 33851_at      | AF093680      | similar to mouse Glt3 or D. melanogaster transcription factor IIB                                 | NM_013242   |
| Pancreas   | 38009_at      | PDEF          | prostate epithelium-specific Ets transcription factor                                             | NM_012391   |
| Pancreas   | 38787_at      | PML           | promyelocytic leukemia                                                                            | NM_002675   |
| Pancreas   | 39479_g_at    | none          | ESTs                                                                                              | Hs.119683   |
| Pancreas   | 39859_r_at    | STX11         | syntaxin 11                                                                                       | NM_003764   |
| Pancreas   | 39904_at      | KIP2          | DNA-dependent protein kinase catalytic subunit-interacting protein 2                              | NM_006383   |
| Pancreas   | 40197_at      | HYA22         | HYA22 protein                                                                                     | NM_005808   |
| Pancreas   | 40204_at      | CTRL          | chymotrypsin-like                                                                                 | NM_001907   |
| Pancreas   | 40267_s_at    | KIAA1036      | KIAA1036 protein                                                                                  | NM_014909   |
| Pancreas   | 41261_at      | DKFZP547E1010 | DKFZP547E1010 protein                                                                             | NM_015607   |
| Pancreas   | 41512_at      | BRAP          | BRCA1 associated protein                                                                          | NM_006768   |
| Pancreas   | 33119_at      | FLJ20152      | hypothetical protein                                                                              | NM_019000   |
| Pancreas   | 33190_g_at    | FLJ10512      | hypothetical protein FLJ10512                                                                     | NM_018121   |
| Pancreas   | 1995_at       | none          | U16815 exon HSU16815 Human excision repair-controlling (XPAC) gene  GenBank==U16815               |             |
| Pancreas   | 1956_s_at     | none          | Homo sapiens inducible nitric oxide synthase (iNOS) mRNA, complete cds                            | Hs.248084   |
| Pancreas   | 1548_s_at     | IL10          | interleukin 10                                                                                    | NM_000572   |
| Pancreas   | 1541_f_at     | IFNA6         | interferon, alpha 6                                                                               | NM_021002   |
| Pancreas   | 839_at        | none          | U46499 HSGST12S6 Human microsomal glutathione transferase (GST12) gene  GenBank==U46499           |             |
| Pancreas   | 561_at        | FSHR          | follicle stimulating hormone receptor                                                             | NM_000145   |
| Pancreas   | 433_at        | none          | X02883 exon#4 HSTCRAC Human gene for T-cell receptor alpha chain C region  GenBank==X02883        |             |
| Pancreas   | 386_g_at      | CTRL          | chymotrypsin-like                                                                                 | NM_001907   |
| Liver      | 31591_s_at    | FHR-4         | complement factor H-related 4                                                                     | NM_006684   |
| Liver      | 31721_at      | LPA           | lipoprotein, Lp(a)                                                                                | NM_005577   |
| Liver      | 33022_at      | RODH-4        | microsomal NAD+-dependent retinol dehydrogenase 4                                                 | NM_003708   |
| Liver      | 35113_at      | SLC22A1       | solute carrier family 22 (organic cation transporter), member 1                                   | NM_003057   |
| Liver      | 35498_at      | CRYGA         | crystallin, gamma A                                                                               | NM_014617   |
| Liver      | 35504_at      | SMARCF1       | SWI/SNF related, matrix associated, actin dependent regulator of chromatin, subfamily f, member 1 | NM_006015   |
| Liver      | 35526_at      | C9            | complement component 9                                                                            | NM_001737   |
| Liver      | 35556_at      | F9            | coagulation factor IX (plasma thromboplastic component, Christmas disease, hemophilia B)          | NM_000133   |

| Max Tissue | Affy Probe ID | Symbol   | Description                                                                                                                                | Accession # |
|------------|---------------|----------|--------------------------------------------------------------------------------------------------------------------------------------------|-------------|
| Liver      | 36341_s_at    | HFL3     | H factor (complement)-like 3                                                                                                               | NM_005666   |
| Liver      | 36342_r_at    | HFL3     | H factor (complement)-like 3                                                                                                               | NM_005666   |
| Liver      | 36436_at      | LECT2    | leukocyte cell-derived chemotaxin 2                                                                                                        | NM_002302   |
| Liver      | 32347_at      | CYP4F11  | cytochrome P450, subfamily IVF, polypeptide 11                                                                                             | NM_021187   |
| Liver      | 32369_at      | SAA4     | serum amyloid A4, constitutive                                                                                                             | NM_006512   |
| Liver      | 32376_at      | SLC25A20 | solute carrier family 25 (carnitine/acylcarnitine translocase), member 20                                                                  | NM_000387   |
| Liver      | 32886_at      | GCGR     | glucagon receptor                                                                                                                          | NM_000160   |
| Liver      | 32945_i_at    | MBL2     | mannose-binding lectin (protein C) 2, soluble (opsonic defect)                                                                             | NM_000242   |
| Liver      | 32962_at      | CTH      | cystathionase (cystathionine gamma-lyase)                                                                                                  | NM_001902   |
| Liver      | 32966_at      | APOF     | apolipoprotein F                                                                                                                           | NM_001638   |
| Liver      | 33564_at      | AFM      | afamin                                                                                                                                     | NM_001133   |
| Liver      | 34430_at      | GPT      | glutamic-pyruvate transaminase (alanine aminotransferase)                                                                                  | NM_005309   |
| Liver      | 34434_at      | SCYA16   | small inducible cytokine subfamily A (Cys-Cys), member 16                                                                                  | NM_004590   |
| Liver      | 34504_at      | SPP2     | secreted phosphoprotein 2, 24kD                                                                                                            | NM_006944   |
| Liver      | 35405_at      | TAT      | tyrosine aminotransferase                                                                                                                  | NM_000353   |
| Liver      | 35482_at      | AKR1C4   | aldo-keto reductase family 1, member C4 (chlordecone reductase; 3-alpha hydroxysteroid dehydrogenase, type I; dihydrodiol dehydrogenase 4) | NM_001818   |
| Liver      | 35891_at      | HAO1     | hydroxyacid oxidase (glycolate oxidase) 1                                                                                                  | NM_017545   |
| Liver      | 35953_at      | CPN1     | carboxypeptidase N, polypeptide 1, 50kD                                                                                                    | NM_001308   |
| Liver      | 36316_r_at    | SEC15B   | Sec15B protein                                                                                                                             | none        |
| Liver      | 37058_at      | UGT2B4   | UDP glycosyltransferase 2 family, polypeptide B4                                                                                           | NM_021139   |
| Liver      | 37059_at      | GCKR     | glucokinase (hexokinase 4) regulatory protein                                                                                              | NM_001486   |
| Liver      | 37514_s_at    | MASP2    | mannan-binding lectin serine protease 2                                                                                                    | NM_006610   |
| Liver      | 37838_at      | F12      | coagulation factor XII (Hageman factor)                                                                                                    | NM_000505   |
| Liver      | 38890_at      | APCS     | amyloid P component, serum                                                                                                                 | NM_001639   |
| Liver      | 40311_at      | TFR2     | transferrin receptor 2                                                                                                                     | NM_003227   |
| Liver      | 40368_r_at    | CPN2     | carboxypeptidase N, polypeptide 2, 83kD                                                                                                    | none        |
| Liver      | 40665_at      | FMO3     | flavin containing monooxygenase 3                                                                                                          | NM_006894   |
| Liver      | 40679_at      | SLC6A12  | solute carrier family 6 (neurotransmitter transporter, betaine/GABA), member 12                                                            | NM_003044   |
| Liver      | 41023_at      | C8A      | complement component 8, alpha polypeptide                                                                                                  | NM_000562   |
| Liver      | 31825_at      | SERPIND1 | serine (or cysteine) proteinase inhibitor, clade D (heparin cofactor), member 1                                                            | NM_000185   |
| Liver      | 32631_at      | none     | J03060:Human glucocerebrosidase (GCB) gene /cds=(229  GenBank==J03060                                                                      |             |
| Liver      | 32705_at      | CYP3A7   | cytochrome P450, subfamily IIIA, polypeptide 7                                                                                             | NM_000765   |
| Liver      | 37175_at      | SERPINC1 | serine (or cysteine) proteinase inhibitor, clade C (antithrombin), member 1                                                                | NM_000488   |
| Liver      | 38329_at      | SLC25A13 | solute carrier family 25, member 13 (citrin)                                                                                               | NM_014251   |
| Liver      | 38367_s_at    | C4BPB    | complement component 4-binding protein, beta                                                                                               | NM_000716   |
| Liver      | 38611_at      | LIPC     | lipase, hepatic                                                                                                                            | NM_000236   |
| Liver      | 41181_r_at    | DDT      | D-dopachrome tautomerase                                                                                                                   | NM_001355   |
| Liver      | 32817_at      | SEC14L2  | SEC14 (S. cerevisiae)-like 2                                                                                                               | NM_012429   |
| Liver      | 34884_at      | CPS1     | carbamoyl-phosphate synthetase 1, mitochondrial                                                                                            | NM_001875   |
| Liver      | 36584_at      | ITIH2    | inter-alpha (globulin) inhibitor, H2 polypeptide                                                                                           | NM_002216   |
| Liver      | 37020_at      | CRP      | C-reactive protein, pentraxin-related                                                                                                      | NM_000567   |
| Liver      | 39880_at      | FLJ10120 | hypothetical protein FLJ10120                                                                                                              | NM_018001   |
| Liver      | 33183_at      | GALK1    | galactokinase 1                                                                                                                            | NM_000154   |
| Liver      | 33195_at      | DHODH    | dihydroorotate dehydrogenase                                                                                                               | none        |
| Liver      | 1962_at       | ARG1     | arginase, liver                                                                                                                            | NM_000045   |
| Liver      | 1080_s_at     | CYP1A2   | cytochrome P450, subfamily I (aromatic compound-inducible), polypeptide 2                                                                  | NM_000761   |
| Liver      | 742_at        | HABP2    | hyaluronan-binding protein 2                                                                                                               | NM_004132   |
| Liver      | 573_at        | IGFALS   | insulin-like growth factor binding protein, acid labile subunit                                                                            | NM_004970   |
| Liver      | 405_at        | RXRA     | retinoid X receptor, alpha                                                                                                                 | NM_002957   |
| Liver      | 261_s_at      | APOB     | apolipoprotein B (including Ag(x) antigen)                                                                                                 | NM_000384   |
| Placenta   | 31588_at      | HMG4     | high-mobility group (nonhistone chromosomal) protein 4                                                                                     | NM_005342   |

| Max Tissue     | Affy Probe ID | Symbol     | Description                                                                                              | Accession # |
|----------------|---------------|------------|----------------------------------------------------------------------------------------------------------|-------------|
| Placenta       | 31598_s_at    | GALE       | galactose-4-epimerase, UDP-                                                                              | NM_000403   |
| Placenta       | 33046_f_at    | EMX1       | empty spiracles (Drosophila) homolog 1                                                                   | none        |
| Placenta       | 33620_at      | HOXB3      | homeo box B3                                                                                             | NM_002146   |
| Placenta       | 32303_at      | ETV3       | ets variant gene 3                                                                                       | none        |
| Placenta       | 34939_r_at    | none       | Homo sapiens clone 24566 mRNA sequence                                                                   | Hs.133342   |
| Placenta       | 35491_at      | MAGEA10    | melanoma antigen, family A, 10                                                                           | NM_021048   |
| Placenta       | 35935_at      | CPT1B      | carnitine palmitoyltransferase I, muscle                                                                 | NM_004377   |
| Placenta       | 37093_at      | P11        | protease, serine, 22                                                                                     | NM_006025   |
| Placenta       | 38180_f_at    | PSG9       | pregnancy specific beta-1-glycoprotein 9                                                                 | NM_002784   |
| Placenta       | 39314_at      | ACVR2B     | activin A receptor, type IIB                                                                             | NM_001106   |
| Placenta       | 39622_at      | GCMA       | glial cells missing (Drosophila) homolog a                                                               | NM_003643   |
| Placenta       | 40733_f_at    | MSX2       | msh (Drosophila) homeo box homolog 2                                                                     | NM_002449   |
| Placenta       | 40761_at      | SLC16A5    | solute carrier family 16 (monocarboxylic acid transporters), member 5                                    | NM_004695   |
| Placenta       | 41087_at      | DLX5       | distal-less homeo box 5                                                                                  | NM_005221   |
| Placenta       | 41870_at      | T1A-2      | lung type-I cell membrane-associated glycoprotein                                                        | NM_006474   |
| Placenta       | 33714_at      | HMG4       | high-mobility group (nonhistone chromosomal) protein 4                                                   | NM_005342   |
| Placenta       | 34219_at      | INSL4      | insulin-like 4 (placenta)                                                                                | NM_002195   |
| Placenta       | 36000_at      | CREBL1     | cAMP responsive element binding protein-like 1                                                           | NM_004381   |
| Placenta       | 37185_at      | SERPINB2   | serine (or cysteine) proteinase inhibitor, clade B (ovalbumin), member 2                                 | NM_002575   |
| Placenta       | 38249_at      | TONDU      | TONDU                                                                                                    | NM_016267   |
| Placenta       | 37327_at      | EGFR       | epidermal growth factor receptor (avian erythroblastic leukemia viral (v-erb-b) oncogene homolog)        | NM_005228   |
| Placenta       | 38770_at      | ADAM12     | a disintegrin and metalloproteinase domain 12 (meltrin alpha)                                            | NM_003474   |
| Placenta       | 39151_at      | LOC57036   | similar to pregnancy-associated plasma protein A precursor                                               | none        |
| Placenta       | 39454_f_at    | HOX11L1    | homeo box 11-like 1                                                                                      | NM_001534   |
| Placenta       | 40237_at      | TSSC3      | tumor suppressing subtransferable candidate 3                                                            | NM_003311   |
| Placenta       | 40892_s_at    | DXS9879E   | DNA segment on chromosome X (unique) 9879 expressed sequence                                             | NM_006014   |
| Placenta       | 2074_at       | GJA5       | gap junction protein, alpha 5, 40kD (connexin 40)                                                        | NM_005266   |
| Placenta       | 1645_at       | KISS1      | KISS-1 metastasis-suppressor                                                                             | NM_002256   |
| Placenta       | 1619_g_at     | CYP19      | cytochrome P450, subfamily XIX (aromatization of androgens)                                              | NM_000103   |
| Placenta       | 1545_g_at     | FLT1       | fms-related tyrosine kinase 1 (vascular endothelial growth factor/vascular permeability factor receptor) | NM_002019   |
| Thymus         | 32009_at      | CCR9       | chemokine (C-C motif) receptor 9                                                                         | NM_006641   |
| Thymus         | 33004_g_at    | NCK2       | NCK adaptor protein 2                                                                                    | NM_003581   |
| Thymus         | 34175_r_at    | none       | Homo sapiens mRNA; cDNA DKFZp564B083 (from clone DKFZp564B083)                                           | Hs.234794   |
| Thymus         | 32941_at      | ICSBP1     | interferon consensus sequence binding protein 1                                                          | NM_002163   |
| Thymus         | 33513_at      | SLAM       | signaling lymphocytic activation molecule                                                                | NM_003037   |
| Thymus         | 34927_at      | CD1B       | CD1B antigen, b polypeptide                                                                              | NM_001764   |
| Thymus         | 34974_at      | ADAMDEC1   | ADAM-like, decysin 1                                                                                     | NM_014479   |
| Thymus         | 36726_at      | PAX1       | paired box gene 1                                                                                        | NM_006192   |
| Thymus         | 37416_at      | ARHH       | ras homolog gene family, member H                                                                        | NM_004310   |
| Thymus         | 37861_at      | CD1E       | CD1E antigen, e polypeptide                                                                              | NM_030893   |
| Thymus         | 38147_at      | SH2D1A     | SH2 domain protein 1A, Duncan's disease (lymphoproliferative syndrome)                                   | NM_002351   |
| Thymus         | 39604_at      | none       | ESTs                                                                                                     | Hs.341182   |
| Thymus         | 40721_g_at    | DJ434O14.3 | hypothetical protein dJ434O14.3                                                                          | NM_025228   |
| Thymus         | 32121_at      | PIK3CD     | phosphoinositide-3-kinase, catalytic, delta polypeptide                                                  | NM_005026   |
| Thymus         | 37625_at      | IRF4       | interferon regulatory factor 4                                                                           | NM_002460   |
| Thymus         | 38823_s_at    | STK17A     | serine/threonine kinase 17a (apoptosis-inducing)                                                         | NM_004760   |
| Thymus         | 2042_s_at     | MYB        | v-myb avian myeloblastosis viral oncogene homolog                                                        | NM_005375   |
| Thymus         | 1518_at       | ETS1       | v-ets avian erythroblastosis virus E26 oncogene homolog 1                                                | NM_005238   |
| Thymus         | 1479_g_at     | ITK        | IL2-inducible T-cell kinase                                                                              | NM_005546   |
| Thymus         | 1482_g_at     | MMP12      | matrix metalloproteinase 12 (macrophage elastase)                                                        | NM_002426   |
| Thymus         | 1139_at       | GNA13      | guanine nucleotide binding protein (G protein), alpha 13                                                 | NM_006572   |
| Salivary gland | 31320_at      | GPR12      | G protein-coupled receptor 12                                                                            | NM_005288   |

| Max Tissue     | Affy Probe ID | Symbol   | Description                                                                                     | Accession # |
|----------------|---------------|----------|-------------------------------------------------------------------------------------------------|-------------|
| Salivary gland | 31544_at      | FOXI1    | forkhead box I1                                                                                 | NM_012188   |
| Salivary gland | 31723_at      | CST5     | cystatin D                                                                                      | NM_001900   |
| Salivary gland | 31913_at      | ELF5     | E74-like factor 5 (ets domain transcription factor)                                             | NM_001422   |
| Salivary gland | 31971_at      | GR6      | putative GR6 protein                                                                            | NM_007354   |
| Salivary gland | 35030_i_at    | KIAA0316 | KIAA0316 gene product                                                                           | none        |
| Salivary gland | 35037_at      | SLC28A1  | solute carrier family 28 (sodium-coupled nucleoside transporter), member 1                      | NM_004213   |
| Salivary gland | 35051_at      | CA6      | carbonic anhydrase VI                                                                           | NM_001215   |
| Salivary gland | 35078_at      | ICAM4    | intercellular adhesion molecule 4, Landsteiner-Wiener blood group                               | NM_001544   |
| Salivary gland | 35608_at      | MLLT4    | myeloid/lymphoid or mixed-lineage leukemia (trithorax (Drosophila) homolog); translocated to, 4 | NM_005936   |
| Salivary gland | 32895_f_at    | HRBL     | HIV-1 Rev binding protein-like                                                                  | none        |
| Salivary gland | 34980_at      | GASC1    | gene amplified in squamous cell carcinoma 1                                                     | none        |
| Salivary gland | 35386_at      | ACHE     | acetylcholinesterase (YT blood group)                                                           | NM_000665   |
| Salivary gland | 36329_at      | MGB1     | mammaglobin 1                                                                                   | NM_002411   |
| Salivary gland | 40373_at      | PRH2     | proline-rich protein HaeIII subfamily 2                                                         | NM_005042   |
| Salivary gland | 37227_at      | LOC56899 | putative 47 kDa protein                                                                         | NM_020140   |
| Salivary gland | 1646_at       | BIRC4    | baculoviral IAP repeat-containing 4                                                             | NM_001167   |
| Kidney         | 36352_at      | HES2     | hairy and enhancer of split (Drosophila) homolog 2                                              | NM_019089   |
| Kidney         | 34024_at      | CLCN5    | chloride channel 5 (nephrolithiasis 2, X-linked, Dent disease)                                  | NM_000084   |
| Kidney         | 34038_at      | SLC6A13  | solute carrier family 6 (neurotransmitter transporter, GABA), member 13                         | NM_016615   |
| Kidney         | 34516_at      | SLC12A1  | solute carrier family 12 (sodium/potassium/chloride transporters), member 1                     | NM_000338   |
| Kidney         | 35416_at      | CUBN     | cubilin (intrinsic factor-cobalamin receptor)                                                   | NM_001081   |
| Kidney         | 35867_at      | SLC22A2  | solute carrier family 22 (organic cation transporter), member 2                                 | NM_003058   |
| Kidney         | 36327_at      | KCNJ1    | potassium inwardly-rectifying channel, subfamily J, member 1                                    | NM_000220   |
| Kidney         | 37097_at      | SLC17A1  | solute carrier family 17 (sodium phosphate), member 1                                           | NM_005074   |
| Kidney         | 39679_at      | AQP2     | aquaporin 2 (collecting duct)                                                                   | NM_000486   |
| Kidney         | 40037_at      | XPNPEP2  | X-prolyl aminopeptidase (aminopeptidase P) 2, membrane-bound                                    | NM_003399   |
| Kidney         | 31806_at      | FMO1     | flavin containing monooxygenase 1                                                               | NM_002021   |
| Kidney         | 35220_at      | ENPEP    | glutamyl aminopeptidase (aminopeptidase A)                                                      | NM_001977   |
| Kidney         | 38304_r_at    | KL       | klotho                                                                                          | NM_004795   |
| Kidney         | 711_at        | TP53BP1  | tumor protein p53-binding protein, 1                                                            | NM_005657   |
| Kidney         | 32912_at      | POU3F4   | POU domain, class 3, transcription factor 4                                                     | NM_000307   |
| Heart          | 37076_at      | SLC2A4   | solute carrier family 2 (facilitated glucose transporter), member 4                             | NM_001042   |
| Heart          | 38206_at      | RPL3L    | ribosomal protein L3-like                                                                       | NM_005061   |
| Heart          | 39215_at      | NPPB     | natriuretic peptide precursor B                                                                 | NM_002521   |
| Heart          | 35982_at      | HSPB3    | heat shock 27kD protein 3                                                                       | NM_006308   |
| Heart          | 35989_at      | CS-1     | calcineurin-binding protein calsarcin-1                                                         | NM_016599   |
| Heart          | 36477_at      | TNNI3    | troponin I, cardiac                                                                             | NM_000363   |
| Heart          | 40058_s_at    | LIM      | LIM protein (similar to rat protein kinase C-binding enigma)                                    | NM_006457   |
| Heart          | 40062_s_at    | MYL4     | myosin, light polypeptide 4, alkali; atrial, embryonic                                          | NM_002476   |
| Heart          | 34869_at      | ZASP     | Z-band alternatively spliced PDZ-motif                                                          | none        |
| Heart          | 38793_at      | TNNT2    | troponin T2, cardiac                                                                            | NM_000364   |
| Cerebellum     | 31581_at      | none     | Homo sapiens Ig kappa light chain variable region (VkII-A23) mRNA, complete cds                 | Hs.113273   |
| Cerebellum     | 36351_at      | FKSG28   | hypothetical protein FKSG28                                                                     | NM_030929   |
| Cerebellum     | 36776_at      | LAG3     | lymphocyte-activation gene 3                                                                    | NM_002286   |
| Cerebellum     | 38209_at      | PTGER1   | prostaglandin E receptor 1 (subtype EP1), 42kD                                                  | NM_000955   |
| Cerebellum     | 39211_at      | FLJ10374 | hypothetical protein FLJ10374                                                                   | NM_018074   |
| Cerebellum     | 35659_at      | IL10RA   | interleukin 10 receptor, alpha                                                                  | NM_001558   |
| Cerebellum     | 35994_at      | F25965   | hypothetical protein F25965                                                                     | none        |
| Cerebellum     | 36887_f_at    | KIR3DL1  | killer cell immunoglobulin-like receptor, three domains, long cytoplasmic tail, 1               | NM_013289   |
| Cerebellum     | 1811_at       | PTPRH    | protein tyrosine phosphatase, receptor type, H                                                  | NM_002842   |

| Max Tissue      | Affy Probe ID | Symbol    | Description                                                                                                                                           | Accession # |
|-----------------|---------------|-----------|-------------------------------------------------------------------------------------------------------------------------------------------------------|-------------|
| Cerebellum      | 1628_at       | FUT8      | fucosyltransferase 8 (alpha (1,6) fucosyltransferase)                                                                                                 | NM_004480   |
| Pituitary gland | 36694_at      | KCNS3     | potassium voltage-gated channel, delayed-rectifier, subfamily S, member 3                                                                             | NM_002252   |
| Pituitary gland | 38239_at      | none      | Homo sapiens mRNA; cDNA DKFZp564B2062 (from clone DKFZp564B2062)                                                                                      | Hs.16762    |
| Pituitary gland | 38879_at      | S100A12   | S100 calcium-binding protein A12 (calgranulin C)                                                                                                      | NM_005621   |
| Pituitary gland | 39277_at      | OSMR      | oncostatin M receptor                                                                                                                                 | NM_003999   |
| Pituitary gland | 41038_at      | NCF2      | neutrophil cytosolic factor 2 (65kD, chronic granulomatous disease, autosomal 2)                                                                      | NM_000433   |
| Pituitary gland | 33766_at      | VIPR1     | vasoactive intestinal peptide receptor 1                                                                                                              | NM_004624   |
| Pituitary gland | 33383_f_at    | RARA      | retinoic acid receptor, alpha                                                                                                                         | NM_000964   |
| Pituitary gland | 2002_s_at     | BCL2A1    | BCL2-related protein A1                                                                                                                               | NM_004049   |
| Pituitary gland | 1520_s_at     | IL1B      | interleukin 1, beta                                                                                                                                   | NM_000576   |
| Pituitary gland | 1321_s_at     | EMP1      | epithelial membrane protein 1                                                                                                                         | NM_001423   |
| Lung            | 32383_at      | GHRHR     | growth hormone releasing hormone receptor                                                                                                             | NM_000823   |
| Lung            | 32384_g_at    | GHRHR     | growth hormone releasing hormone receptor                                                                                                             | NM_000823   |
| Lung            | 34014_f_at    | POU1F1    | POU domain, class 1, transcription factor 1 (Pit1, growth hormone factor 1)                                                                           | NM_000306   |
| Lung            | 38151_at      | LOH11CR2A | loss of heterozygosity, 11, chromosomal region 2, gene A                                                                                              | NM_014622   |
| Lung            | 38886_i_at    | ARHI      | ras homolog gene family, member I                                                                                                                     | NM_004675   |
| Lung            | 40351_at      | GNB3      | guanine nucleotide binding protein (G protein), beta polypeptide 3                                                                                    | NM_002075   |
| Lung            | 33711_at      | POMC      | proopiomelanocortin (adrenocorticotropin/ beta-lipotropin/ alpha-melanocyte stimulating hormone/ beta-melanocyte stimulating hormone/ beta-endorphin) | NM_000939   |
| Lung            | 37764_at      | HLCS      | holocarboxylase synthetase (biotin-[propionyl-Coenzyme A-carboxylase (ATP-hydrolysing)] ligase)                                                       | NM_000411   |
| Lung            | 1123_at       | GHRHR     | growth hormone releasing hormone receptor                                                                                                             | NM_000823   |
| Lung            | 1049_g_at     | RXRG      | retinoid X receptor, gamma                                                                                                                            | NM_006917   |
| Spleen          | 32406_at      | KIAA0889  | KIAA0889 protein                                                                                                                                      | NM_015377   |
| Spleen          | 35115_at      | CDH22     | cadherin-like 22                                                                                                                                      | none        |
| Spleen          | 35554_f_at    | ZIC2      | Zic family member 2 (odd-paired Drosophila homolog)                                                                                                   | NM_007129   |
| Spleen          | 36389_at      | CRTAM     | class-I MHC-restricted T cell associated molecule                                                                                                     | NM_019604   |
| Spleen          | 34025_at      | GABRA6    | gamma-aminobutyric acid (GABA) A receptor, alpha 6                                                                                                    | NM_000811   |
| Spleen          | 34528_at      | none      | Homo sapiens clone 23687 mRNA sequence                                                                                                                | Hs.12513    |
| Spleen          | 36768_at      | NEUROD1   | neurogenic differentiation 1                                                                                                                          | NM_002500   |
| Spleen          | 39297_at      | MAB21L1   | mab-21 (C. elegans)-like 1                                                                                                                            | NM_005584   |
| Spleen          | 34700_at      | none      | Homo sapiens mRNA; cDNA DKFZp434N1221 (from clone DKFZp434N1221)                                                                                      | Hs.334656   |
| Spleen          | 40958_at      | KIAA0599  | KIAA0599 protein                                                                                                                                      | none        |
| Thyroid         | 32471_at      | TSHR      | thyroid stimulating hormone receptor                                                                                                                  | NM_000369   |
| Thyroid         | 36370_at      | FOXE1     | forkhead box E1 (thyroid transcription factor 2)                                                                                                      | NM_004473   |
| Thyroid         | 34514_at      | TSHR      | thyroid stimulating hormone receptor                                                                                                                  | NM_000369   |
| Thyroid         | 34515_g_at    | TSHR      | thyroid stimulating hormone receptor                                                                                                                  | NM_000369   |
| Thyroid         | 37611_at      | TNFRSF11B | tumor necrosis factor receptor superfamily, member 11b (osteoprotegerin)                                                                              | NM_002546   |
| Thyroid         | 41757_at      | VAPB      | VAMP (vesicle-associated membrane protein)-associated protein B and C                                                                                 | NM_004738   |
| Thyroid         | 34399_at      | PTH       | parathyroid hormone                                                                                                                                   | NM_000315   |
| Thyroid         | 708_at        | PTH       | parathyroid hormone                                                                                                                                   | NM_000315   |
| Trachea         | 33529_at      | ADH7      | alcohol dehydrogenase 7 (class IV), mu or sigma polypeptide                                                                                           | NM_000673   |
| Trachea         | 36767_at      | CYP1A1    | cytochrome P450, subfamily I (aromatic compound-inducible), polypeptide 1                                                                             | NM_000499   |
| Trachea         | 38489_at      | HBP17     | heparin-binding growth factor binding protein                                                                                                         | NM_005130   |
| Trachea         | 40031_at      | ALDH3A1   | aldehyde dehydrogenase 3 family, member A1                                                                                                            | NM_000691   |
| Trachea         | 40339_at      | GABRP     | gamma-aminobutyric acid (GABA) A receptor, pi                                                                                                         | NM_014211   |
| Trachea         | 41623_s_at    | FZR1      | Fzr1 protein                                                                                                                                          | NM_016263   |
| Trachea         | 298_at        | none      | Mucin [TIGR]==HG4411-HT4681                                                                                                                           |             |
| Trachea         | 233_s_at      | MATN1     | matrilin 1, cartilage matrix protein                                                                                                                  | NM_002379   |

| Max Tissue      | Affy Probe ID | Symbol   | Description                                                                                                              | Accession # |
|-----------------|---------------|----------|--------------------------------------------------------------------------------------------------------------------------|-------------|
| DRG             | 34566_at      | CALCB    | calcitonin-related polypeptide, beta                                                                                     | NM_000728   |
| DRG             | 35605_at      | CTD6     | angiopoietin-like factor                                                                                                 | NM_021146   |
| DRG             | 36299_at      | none     | ESTs, Highly similar to 1005250A calcitonin gene related peptide [H.sapiens]                                             | Hs.288190   |
| DRG             | 36300_at      | CALCA    | calcitonin/calcitonin-related polypeptide, alpha                                                                         | NM_001741   |
| DRG             | 40398_s_at    | MEOX2    | mesenchyme homeo box 2 (growth arrest-specific homeo box)                                                                | NM_005924   |
| DRG             | 1892_s_at     | none     | Proto-Oncogene Trk [TIGR==HG1437-HT1437]                                                                                 |             |
| DRG             | 1745_at       | IFITM3   | interferon induced transmembrane protein 3 (1-8U)                                                                        | NM_021034   |
| Prostate        | 34996_at      | TMPRSS2  | transmembrane protease, serine 2                                                                                         | NM_005656   |
| Prostate        | 37430_at      | ALOX15B  | arachidonate 15-lipoxygenase, second type                                                                                | NM_001141   |
| Prostate        | 33271_r_at    | DMXL1    | Dmx-like 1                                                                                                               | NM_005509   |
| Prostate        | 36898_r_at    | PRIM2A   | primase, polypeptide 2A (58kD)                                                                                           | NM_000947   |
| Prostate        | 38615_at      | GW112    | differentially expressed in hematopoietic lineages                                                                       | NM_006418   |
| Uterus          | 35404_at      | TACR2    | tachykinin receptor 2                                                                                                    | NM_001057   |
| Uterus          | 37105_at      | CTSG     | cathepsin G                                                                                                              | NM_001911   |
| Uterus          | 39325_at      | EBAF     | endometrial bleeding associated factor (left-right determination, factor A; transforming growth factor beta superfamily) | NM_003240   |
| Uterus          | 779_at        | COL4A6   | collagen, type IV, alpha 6                                                                                               | none        |
| Ovary           | 40661_at      | NR4A3    | nuclear receptor subfamily 4, group A, member 3                                                                          | NM_006981   |
| Ovary           | 31880_at      | D8S2298E | reproduction 8                                                                                                           | NM_005671   |
| Ovary           | 39877_at      | KCNC4    | potassium voltage-gated channel, Shaw-related subfamily, member 4                                                        | NM_004978   |
| Cortex          | 36853_at      | GRIA1    | glutamate receptor, ionotropic, AMPA 1                                                                                   | NM_000827   |
| Cortex          | 35825_s_at    | ZNF238   | zinc finger protein 238                                                                                                  | NM_006352   |
| Amygdala        | 34973_at      | ATP8A1   | ATPase, aminophospholipid transporter (APLT), Class I, type 8A, member 1                                                 | none        |
| Amygdala        | 34748_at      | KIAA0846 | KIAA0846 protein                                                                                                         | NM_015376   |
| Thalamus        | 36487_at      | SHOX2    | short stature homeobox 2                                                                                                 | NM_003030   |
| Thalamus        | 615_s_at      | PTHLH    | parathyroid hormone-like hormone                                                                                         | NM_002820   |
| Corpus callosum | 41708_at      | KIAA1034 | KIAA1034 protein                                                                                                         | none        |
| Corpus callosum | 39451_i_at    | IDS      | iduronate 2-sulfatase (Hunter syndrome)                                                                                  | NM_000202   |
| Adrenal gland   | 1576_g_at     | ABCB1    | ATP-binding cassette, sub-family B (MDR/TAP), member 1                                                                   | NM_000927   |
| Adrenal gland   | 1412_g_at     | CYP11B1  | cytochrome P450, subfamily XIB (steroid 11-beta-hydroxylase), polypeptide 1                                              | NM_000497   |
| Caudate nucleus | 31400_at      | DGKB     | diacylglycerol kinase, beta (90kD)                                                                                       | none        |
| Spinal cord     | 36367_at      | PCDH11   | protocadherin 11                                                                                                         | NM_014522   |
