# Supplementary material
Source: PubMed Central journal article supplement (PMC123671)
Supplement: pnas_012025199_2.pdf [file pnas_012025199_2.pdf]

| Max Tissue | Affy ID     | Symbol        | Description                                                                                                                                                                                      | AC        |
|------------|-------------|---------------|--------------------------------------------------------------------------------------------------------------------------------------------------------------------------------------------------|-----------|
| Testis     | 92825_at    | Tpx1          | testis specific gene 1                                                                                                                                                                           | NM_009420 |
|            |             |               | AI852916:UI-M-BH0-aiz-b-03-0-UI.s1 Mus musculus cDNA 3 end /clone=UI-M-BH0-aiz-b-03-0-UI /clone_end=3 /gb=AI852916 /gi=5496822 /ug=Mm.27339 /len=392 /STRA=for Unknown                           |           |
| Testis     | 96654_at    | none          |                                                                                                                                                                                                  |           |
| Testis     | 97264_r_at  | 1200006A05Rik | RIKEN cDNA 1200006A05 gene                                                                                                                                                                       | none      |
|            |             |               | U95607:Mus musculus testis specific DNAj-homolog mRNA complete cds /cds=(72 800) /gb=U95607 /gi=2286122 /ug=Mm.3075 /len=1030 /STRA=for Unknown                                                  |           |
| Testis     | 97480_f_at  | none          |                                                                                                                                                                                                  |           |
| Testis     | 99137_at    | Oaz3          | ornithine decarboxylase antizyme 3                                                                                                                                                               | NM_016901 |
|            |             |               | AW060257:UI-M-BH1-amv-f-08-0-UI.s1 Mus musculus cDNA 3 end /clone=UI-M-BH1-amv-f-08-0-UI /clone_end=3 /gb=AW060257 /gi=6008048 /ug=Mm.43397 /len=434 /STRA=for Unknown                           |           |
| Testis     | 99630_at    | none          |                                                                                                                                                                                                  |           |
|            |             |               | X12521:Transition protein 1 /cds=(9 176) /gb=X12521 /gi=54850 /ug=Mm.661 /len=397 /STRA=rev Unknown                                                                                              |           |
| Testis     | 100624_i_at | none          |                                                                                                                                                                                                  |           |
| Testis     | 100626_at   | Odf2          | outer dense fiber of sperm tails 2                                                                                                                                                               | NM_013615 |
| Testis     | 101108_at   | Nasp          | nuclear autoantigenic sperm protein (histone-binding)                                                                                                                                            | NM_016777 |
| Testis     | 101988_at   | Eno1          | enolase 1, alpha non-neuron                                                                                                                                                                      | NM_023119 |
|            |             |               | AF068865:Mus musculus Delta-like 3 (Dll3) gene alternative splice products exons 1 through 17 and complete cds /cds=(849 2627) /gb=AF068865 /gi=3283410 /ug=Mm.12896 /len=3524 /STRA=for Unknown |           |
| Testis     | 102746_at   | none          |                                                                                                                                                                                                  |           |
| Testis     | 102818_at   | Xmr           | Xlr-related, meiosis regulated                                                                                                                                                                   | NM_009529 |
| Testis     | 102857_at   | Akap4         | A kinase anchor protein 4                                                                                                                                                                        | NM_009651 |
| Testis     | 102994_at   | Stat4         | signal transducer and activator of transcription 4                                                                                                                                               | NM_011487 |
| Testis     | 103405_at   | 2610019A05Rik | RIKEN cDNA 2610019A05 gene                                                                                                                                                                       | none      |
| Testis     | 104593_at   | 1700023O11Rik | RIKEN cDNA 1700023O11 gene                                                                                                                                                                       | none      |
| Testis     | 104622_at   | Tcea2         | transcription elongation factor A (SII), 2                                                                                                                                                       | NM_009326 |
|            |             |               | ESTs, Moderately similar to CYTOCHROME C OXIDASE POLYPEPTIDE VIB [Homo sapiens]                                                                                                                  | Mm.29625  |
| Testis     | 97351_i_at  | none          |                                                                                                                                                                                                  |           |
| Testis     | 97377_at    | Coil          | coilin                                                                                                                                                                                           | NM_016706 |
| Testis     | 97391_at    | D14Erd500e    | DNA segment, Chr 14, ERATO Doi 500, expressed                                                                                                                                                    | none      |
| Testis     | 97965_at    | Pla2g6        | phospholipase A2, group VI                                                                                                                                                                       | NM_016915 |
|            |             |               | M76728:Pyruvate dehydrogenase E1alpha-like /cds=(607 1782) /gb=M76728 /gi=200278 /ug=Mm.4223 /len=2349 /STRA=for Unknown                                                                         |           |
| Testis     | 99542_at    | none          |                                                                                                                                                                                                  |           |
|            |             |               | ESTs, Highly similar to ZINC FINGER PROTEIN 43 [Homo sapiens]                                                                                                                                    | Mm.44706  |
| Testis     | 99987_at    | none          |                                                                                                                                                                                                  |           |
| Testis     | 100402_f_at | Zp3r          | zona pellucida 3 receptor                                                                                                                                                                        | NM_009581 |
| Testis     | 100931_at   | As2           | arylsulfatase A                                                                                                                                                                                  | none      |
| Testis     | 101388_at   | Pgk2          | phosphoglycerate kinase 2                                                                                                                                                                        | NM_031190 |
| Testis     | 101836_at   | Ppm1b         | protein phosphatase 1B, magnesium dependent, beta isoform                                                                                                                                        | none      |
| Testis     | 101860_at   | Gmfb          | glia maturation factor, beta                                                                                                                                                                     | NM_022023 |
| Testis     | 101864_at   | Actl7b        | actin-like 7b                                                                                                                                                                                    | none      |
|            |             |               | AB026984:Mus musculus Gsg3 gene for actin capping protein alpha complete cds /cds=(0 899) /gb=AB026984 /gi=5295995 /ug=Mm.12817 /len=900 /STRA=for Unknown                                       |           |
| Testis     | 102301_at   | none          |                                                                                                                                                                                                  |           |
| Testis     | 102937_at   | 1700021P10Rik | RIKEN cDNA 1700021P10 gene                                                                                                                                                                       | none      |
| Testis     | 102948_at   | Hemt1         | hematopoietic cell transcript 1                                                                                                                                                                  | NM_010416 |
| Testis     | 103489_at   | 4930506L07Rik | RIKEN cDNA 4930506L07 gene                                                                                                                                                                       | NM_026257 |
| Testis     | 103684_at   | Tekt2         | tektin 2                                                                                                                                                                                         | NM_011902 |
| Testis     | 104446_f_at | 4933428G09Rik | RIKEN cDNA 4933428G09 gene                                                                                                                                                                       | none      |
|            |             |               | ESTs, Weakly similar to H11 MOUSE HISTONE H1.1 [M.musculus]                                                                                                                                      | Mm.33796  |
| Testis     | 92180_at    | none          |                                                                                                                                                                                                  |           |
| Testis     | 92190_at    | Nr2c1         | nuclear receptor subfamily 2, group H, member 1                                                                                                                                                  | NM_011629 |
|            |             |               |                                                                                                                                                                                                  |           |
| Testis     | 92292_at    | Slc2a3        | solute carrier family 2 (facilitated glucose transporter), member 3                                                                                                                              | NM_011401 |
| Testis     | 92306_at    | Ott           | ovary testis transcribed                                                                                                                                                                         | none      |

| Max Tissue    | Affy ID     | Symbol           | Description                                                                                                                                                           | AC        |
|---------------|-------------|------------------|-----------------------------------------------------------------------------------------------------------------------------------------------------------------------|-----------|
| Testis        | 92490_at    | Kif9             | kinesin 9                                                                                                                                                             | NM_010628 |
| Testis        | 92692_at    | Sycp1            | synaptonemal complex protein 1                                                                                                                                        | none      |
| Testis        | 92732_at    | Adam2            | a disintegrin and metalloprotease domain 2                                                                                                                            | none      |
| Testis        | 92897_at    | none             | U31992:Acrosomal vesicle protein 1 /cds=(64 849) /gb=U31992 /gi=969102 /ug=Mm.4776 /len=1073 /STRA=for Unknown                                                        |           |
| Testis        | 92966_g_at  | Acre             | acetylcholine receptor epsilon                                                                                                                                        | NM_009603 |
| Testis        | 93408_at    | none             | AI850482:UI-M-BG1-aih-e-09-0-UI.s1 Mus musculus cDNA 3 end /clone=UI-M-BG1-aih-e-09-0-UI /clone_end=3 /gb=AI850482 /gi=5494388 /ug=Mm.6358 /len=467 /STRA=for Unknown |           |
| Testis        | 93897_at    | Theg             | testicular haploid expressed gene                                                                                                                                     | none      |
| Testis        | 93955_at    | Zpbp             | zona pellucida binding protein                                                                                                                                        | NM_015785 |
| Testis        | 94750_at    | Dazl             | deleted in azoospermia-like                                                                                                                                           | NM_010021 |
| Testis        | 95299_at    | none             | ESTs, Weakly similar to DYNEIN HEAVY CHAIN, CYTOSOLIC [Neurospora crassa]                                                                                             | Mm.19936  |
| Testis        | 97745_at    | none             | M27432:Mus musculus Hox-1.4 gene partial cds /cds=(0 320) /gb=M27432 /gi=193957 /ug=Mm.4027 /len=360 /STRA=for Unknown                                                |           |
| Testis        | 98326_f_at  | 4921513E08Rik    | RIKEN cDNA 4921513E08 gene                                                                                                                                            | NM_025725 |
| Testis        | 98343_s_at  | Zfy2             | zinc finger protein 2, Y linked                                                                                                                                       | NM_009571 |
| Testis        | 101240_s_at | Slc30a4          | solute carrier family 30 (zinc transporter), member 4                                                                                                                 | NM_011774 |
| Testis        | 102588_f_at | Txnrd1           | thioredoxin reductase 1                                                                                                                                               | NM_015762 |
| Testis        | 95279_f_at  | none             | ESTs                                                                                                                                                                  | Mm.65528  |
| Testis        | 97661_at    | Tenr             | testis nuclear RNA-binding protein                                                                                                                                    | NM_009350 |
| Testis        | 99316_f_at  | D8Bwg1112e       | DNA segment, Chr 8, Brigham & Women's Genetics 1112 expressed                                                                                                         | none      |
| Testis        | 100171_f_at | 2610022J01Rik    | RIKEN cDNA 2610022J01 gene                                                                                                                                            | none      |
| Testis        | 102514_f_at | Adam5            | a disintegrin and metalloprotease domain 5                                                                                                                            | none      |
| Mammary gland | 93552_at    | none             | ESTs, Highly similar to GALACTOKINASE 2 [Homo sapiens]                                                                                                                | Mm.20216  |
| Mammary gland | 93816_at    | Beta3gnt-pending | beta-1,3-N-acetylglucosaminyltransferase 1                                                                                                                            | NM_016888 |
| Mammary gland | 94234_at    | Abca3            | ATP-binding cassette, sub-family A (ABC1), member 3                                                                                                                   | none      |
| Mammary gland | 95505_at    | Tor1b            | torsin family 1, member B                                                                                                                                             | none      |
| Mammary gland | 95677_at    | 0610009C03Rik    | RIKEN cDNA 0610009C03 gene                                                                                                                                            | none      |
| Mammary gland | 97552_at    | none             | U86090:Kinesin heavy chain member 5B ubiquitous /cds=(244 3135) /gb=U86090 /gi=2062606 /ug=Mm.3380 /len=3791 /STRA=for Unknown                                        |           |
| Mammary gland | 100546_at   | none             | U89506:Mus musculus Mlark mRNA complete cds /cds=(69 1172) /gb=U89506 /gi=2078530 /ug=Mm.542 /len=1617 /STRA=for Unknown                                              |           |
| Mammary gland | 104186_at   | E130103E02Rik    | RIKEN cDNA E130103E02 gene                                                                                                                                            | none      |
| Mammary gland | 104216_at   | Shoc2-pending    | suppressor of clear, C. elegans, homolog of                                                                                                                           | NM_019658 |
| Mammary gland | 92994_at    | Lalba            | lactalbumin, alpha                                                                                                                                                    | NM_010679 |
| Mammary gland | 93876_i_at  | none             | AA682038:vu13a07.s1 Mus musculus cDNA 3 end /clone=IMAGE-1180500 /clone_end=3 /gb=AA682038 /gi=2663070 /ug=Mm.88548 /len=305 /STRA=rev Unknown                        |           |
| Mammary gland | 100396_i_at | Tyms-ps          | thymidylate synthase pseudogene                                                                                                                                       | none      |
| Mammary gland | 100819_f_at | none             | ESTs                                                                                                                                                                  | Mm.83146  |
| Mammary gland | 101290_at   | Gnrh             | gonadotropin releasing hormone                                                                                                                                        | none      |
| Mammary gland | 96458_at    | none             | ESTs                                                                                                                                                                  | Mm.3600   |
| Mammary gland | 97033_f_at  | Cln3             | ceroid lipofuscinosis, neuronal 3, juvenile (Batten, Spielmeyer-Vogt disease)                                                                                         | NM_009907 |
| Mammary gland | 98652_i_at  | none             | AV357553:AV357553 Mus musculus cDNA 3 end /clone=7420405P13 /clone_end=3 /gb=AV357553 /gi=6404555 /ug=Mm.92054 /len=234 /STRA=rev Unknown                             |           |
| Mammary gland | 98716_f_at  | P4hb             | prolyl 4-hydroxylase, beta polypeptide                                                                                                                                | none      |
| Mammary gland | 98738_f_at  | Zfp103           | zinc finger protein 103                                                                                                                                               | NM_009543 |

| Max Tissue    | Affy ID     | Symbol        | Description                                                                                                                                                            | AC        |
|---------------|-------------|---------------|------------------------------------------------------------------------------------------------------------------------------------------------------------------------|-----------|
| Mammary gland | 99763_f_at  | none          | AV306721:AV306721 Mus musculus cDNA 3 end /clone=5730544F18 /clone_end=3 /gb=AV306721 /gi=6339235 /ug=Mm.79990 /len=226 /STRA=rev Unknown                              |           |
| Mammary gland | 103118_i_at | none          | AV345587:AV345587 Mus musculus cDNA 3 end /clone=6430556I01 /clone_end=3 /gb=AV345587 /gi=6386646 /ug=Mm.51904 /len=232 /STRA=rev Unknown                              |           |
| Mammary gland | 103164_i_at | Rpl8          | ribosomal protein L8                                                                                                                                                   | NM_012053 |
| Placenta      | AFFX-TransR | none          | X57349 M.musculus mRNA for transferrin receptor (_5_M_3 represent transcript regions 5 prime Middle and 3 prime respectively) Control Sequence                         |           |
| Placenta      | 94053_at    | none          | A1853843:UI-M-BH0-ajr-d-02-0-UI.s1 Mus musculus cDNA 3 end /clone=UI-M-BH0-ajr-d-02-0-UI /clone_end=3 /gb=A1853843 /gi=5497749 /ug=Mm.22021 /len=570 /STRA=for Unknown |           |
| Placenta      | 94838_r_at  | none          | K02245:Proliferin /cds=(4 678) /gb=K02245 /gi=200400 /ug=Mm.22777 /len=790 /STRA=for Unknown                                                                           |           |
| Placenta      | 98074_at    | none          | A1846851:UI-M-AI1-afk-e-06-0-UI.s1 Mus musculus cDNA 3 end /clone=UI-M-AI1-afk-e-06-0-UI /clone_end=3 /gb=A1846851 /gi=5490757 /ug=Mm.34512 /len=395 /STRA=for Unknown |           |
| Placenta      | 98529_at    | Dtprp         | decidual/trophoblast prolactin-related protein                                                                                                                         | NM_010088 |
| Placenta      | 98548_at    | none          | A1156095:ue11d11.r1 Mus musculus cDNA 5 end /clone=IMAGE-1480053 /clone_end=5 /gb=A1156095 /gi=3684564 /ug=Mm.36666 /len=421 /STRA=rev Unknown                         |           |
| Placenta      | 100520_f_at | none          | A1324118:mh23a06.x1 Mus musculus cDNA 3 end /clone=IMAGE-443314 /clone_end=3 /gb=A1324118 /gi=4058547 /ug=Mm.5099 /len=313 /STRA=rev Unknown                           |           |
| Placenta      | 103378_at   | Prlpa         | prolactin-like protein A                                                                                                                                               | NM_011165 |
| Placenta      | 94951_at    | none          | A1853260:UI-M-BH0-ajl-c-02-0-UI.s1 Mus musculus cDNA 3 end /clone=UI-M-BH0-ajl-c-02-0-UI /clone_end=3 /gb=A1853260 /gi=5497166 /ug=Mm.27117 /len=354 /STRA=for Unknown |           |
| Placenta      | 98023_r_at  | Plfr          | proliferin related protein                                                                                                                                             | NM_011120 |
| Placenta      | 102694_at   | Psg16         | pregnancy specific glycoprotein 16                                                                                                                                     | none      |
| Placenta      | 102925_at   | none          | ESTs, Moderately similar to MAP KINASE PHOSPHATASE-1 [Homo sapiens]                                                                                                    | Mm.16479  |
| Placenta      | 103509_at   | Tnfrsf9       | tumor necrosis factor receptor superfamily, member 9                                                                                                                   | NM_011612 |
| Placenta      | 103676_at   | none          | A1551306:vo77e06.x1 Mus musculus cDNA 3 end /clone=IMAGE-1065154 /clone_end=3 /gb=A1551306 /gi=4483669 /ug=Mm.23845 /len=321 /STRA=rev Unknown                         |           |
| Placenta      | 92478_at    | none          | Mus musculus adult male thymus cDNA, RIKEN full-length enriched library, clone:5830438A17, full insert sequence                                                        | Mm.145100 |
| Placenta      | 92517_at    | Rbms2         | RNA binding motif, single stranded interacting protein 2                                                                                                               | NM_019711 |
| Placenta      | 92766_at    | Hand1         | heart and neural crest derivatives expressed transcript 1                                                                                                              | NM_008213 |
| Placenta      | 93883_at    | none          | K03235:Proliferin /cds=(66 740) /gb=K03235 /gi=200398 /ug=Mm.88796 /len=850 /STRA=for Unknown                                                                          |           |
| Placenta      | 95978_at    | none          | ESTs, Weakly similar to (defline not available 6707754) [C.elegans]                                                                                                    | Mm.25017  |
| Placenta      | 97196_at    | Psg19         | pregnancy specific glycoprotein 19                                                                                                                                     | NM_011964 |
| Thyroid       | 96622_at    | 2610030J16Rik | RIKEN cDNA 2610030J16 gene                                                                                                                                             | NM_026404 |
| Thyroid       | 97852_at    | 4931406I20Rik | RIKEN cDNA 4931406I20 gene                                                                                                                                             | none      |
| Thyroid       | 96312_at    | 2310076D10Rik | RIKEN cDNA 2310076D10 gene                                                                                                                                             | none      |
| Thyroid       | 97476_at    | 1500041N16Rik | RIKEN cDNA 1500041N16 gene                                                                                                                                             | NM_026399 |
| Thyroid       | 97340_at    | Sart3         | squamous cell carcinoma antigen recognized by T-cells 3                                                                                                                | NM_016926 |
| Thyroid       | 102258_at   | Stra6         | stimulated by retinoic acid gene 6                                                                                                                                     | NM_009291 |
| Thyroid       | 102298_at   | Ngfb          | nerve growth factor, beta                                                                                                                                              | NM_013609 |
| Thyroid       | 103998_at   | 8430434E15Rik | RIKEN cDNA 8430434E15 gene                                                                                                                                             | none      |
| Thyroid       | 92393_at    | Kcna3         | potassium voltage gated channel, shaker related subfamily, member 3                                                                                                    | NM_008418 |

| Max Tissue     | Affy ID     | Symbol         | Description                                                                                                                                                | AC        |
|----------------|-------------|----------------|------------------------------------------------------------------------------------------------------------------------------------------------------------|-----------|
| Thyroid        | 98391_at    | Klk11          | kallikrein 11                                                                                                                                              | none      |
| Thyroid        | 99829_at    | Igh-la         | immunoglobulin heavy chain la                                                                                                                              | NM_020523 |
| Thyroid        | 100836_f_at | Lamb3          | laminin, beta 3                                                                                                                                            | NM_008484 |
| Thyroid        | 94615_at    | Enpp2          | ectonucleotide pyrophosphatase/phosphodiesterase 2                                                                                                         | NM_015744 |
| Thyroid        | 96395_at    | Mnat1          | menage a trois 1                                                                                                                                           | NM_008612 |
| Thyroid        | 97048_at    | none           | ESTs, Highly similar to A25687 H-2 class II histocompatibility antigen E-a/k beta-2 chain precursor - mouse [M.musculus]                                   | Mm.139204 |
| Thyroid        | 100157_f_at | Stk16          | serine/threonine kinase 16                                                                                                                                 | NM_011494 |
| Thyroid        | 101644_f_at | V2r8           | vomer nasal organ family 2, receptor, 8                                                                                                                    | NM_009494 |
| Salivary gland | 98611_at    | none           | Mus musculus DNaseI precursor mRNA, complete cds                                                                                                           | Mm.42205  |
| Salivary gland | 102784_at   | none           | ESTs, Highly similar to JC5889 OS-9 protein precursor [H.sapiens]                                                                                          | Mm.13774  |
| Salivary gland | 104570_at   | Cited1         | Cbp/p300-interacting transactivator with Glu/Asp-rich carboxy-terminal domain 1                                                                            | NM_007709 |
| Salivary gland | 96190_at    | 5530401C11Rik  | RIKEN cDNA 5530401C11 gene                                                                                                                                 | none      |
| Salivary gland | 97958_at    | 2010005116Rik  | RIKEN cDNA 2010005116 gene                                                                                                                                 | none      |
| Salivary gland | 99971_at    | none           | ESTs                                                                                                                                                       | Mm.44209  |
| Salivary gland | 95923_at    | none           | ESTs                                                                                                                                                       | Mm.24537  |
| Salivary gland | 96528_at    | none           | ESTs                                                                                                                                                       | Mm.27078  |
| Salivary gland | 98382_f_at  | Prmp5-pending  | proline-rich protein MP5                                                                                                                                   | NM_019628 |
| Salivary gland | 99437_at    | Ly6f           | lymphocyte antigen 6 complex, locus F                                                                                                                      | NM_008530 |
| Salivary gland | 101296_at   | Obp1b          | odorant-binding protein 1b                                                                                                                                 | none      |
| Salivary gland | 94567_f_at  | Rgs11          | regulator of G-protein signaling 11                                                                                                                        | none      |
| Salivary gland | 100268_at   | 6330407G11Rik  | RIKEN cDNA 6330407G11 gene                                                                                                                                 | NM_023423 |
| Salivary gland | 102502_i_at | Vim            | vimentin                                                                                                                                                   | NM_011701 |
| Salivary gland | 103174_f_at | Col15a1        | procollagen, type XV                                                                                                                                       | NM_009928 |
| Eye            | 102393_at   | Crya1          | crystallin, alpha 1                                                                                                                                        | none      |
| Eye            | 97954_at    | Tyrp1          | tyrosinase related protein                                                                                                                                 | NM_031202 |
| Eye            | 101431_at   | Rdh5           | retinol dehydrogenase type 5                                                                                                                               | none      |
| Eye            | 104171_f_at | Crygd          | crystallin, gamma D                                                                                                                                        | NM_007776 |
| Eye            | 93453_at    | Rom1           | rod outer segment membrane protein 1                                                                                                                       | NM_009073 |
| Eye            | 94701_at    | Pde6b          | phosphodiesterase 6B, cGMP, rod receptor, beta polypeptide                                                                                                 | NM_008806 |
| Eye            | 95389_at    | Cncg           | cyclic nucleotide gated channel, cGMP gated                                                                                                                | none      |
| Eye            | 96567_at    | Rho            | rhodopsin                                                                                                                                                  | none      |
| Eye            | 96586_at    | Crygc          | crystallin, gamma C                                                                                                                                        | NM_007775 |
| Eye            | 98807_at    | Gnat2          | guanine nucleotide binding protein, alpha transducing 2                                                                                                    | NM_008141 |
| Eye            | 99860_at    | Gnat1          | guanine nucleotide binding protein, alpha transducing 1                                                                                                    | NM_008140 |
| Eye            | 99238_at    | Gnb3           | guanine nucleotide binding protein, beta 3                                                                                                                 | none      |
| Eye            | 100688_at   | Crybb2         | crystallin, beta B2                                                                                                                                        | NM_007773 |
| Eye            | 101151_at   | Rcvrn          | recoverin                                                                                                                                                  | NM_009038 |
| Eye            | 101169_at   | Prph2          | peripherin 2                                                                                                                                               | NM_008938 |
| Kidney         | 92561_at    | none           | AJ238636:Mus musculus mRNA for nucleoside diphosphatase (ER-UDPase gene) /cds=(232 1515) /gb=AJ238636 /gi=5139518 /ug=Mm.10211 /len=1633 /STRA=for Unknown |           |
| Kidney         | 93781_at    | Aldr6r-pending | aldehyde reductase 6, renal                                                                                                                                | NM_019977 |
| Kidney         | 96078_g_at  | Slc17a1        | solute carrier family 17 (sodium/hydrogen exchanger), member 1                                                                                             | NM_009198 |
| Kidney         | 98131_at    | Cryz           | crystallin, zeta                                                                                                                                           | none      |
| Kidney         | 102053_at   | Plscr2         | phospholipid scramblase 2                                                                                                                                  | NM_008880 |
| Kidney         | 94337_at    | Gas2           | growth arrest specific 2                                                                                                                                   | NM_008087 |
| Kidney         | 94419_at    | Slc19a1        | solute carrier family 19 (sodium/hydrogen exchanger), member 1                                                                                             | NM_031196 |
| Kidney         | 97431_at    | Orct1          | organic cationic transporter-like 1                                                                                                                        | NM_008766 |
| Kidney         | 98482_at    | Pthr           | parathyroid hormone receptor                                                                                                                               | NM_011199 |
| Kidney         | 100913_at   | 2010309H15Rik  | RIKEN cDNA 2010309H15 gene                                                                                                                                 | NM_025590 |
| Kidney         | 100956_at   | Kl             | klotho                                                                                                                                                     | none      |
| Kidney         | 93435_at    | Cyp24          | cytochrome P450, 24                                                                                                                                        | NM_009996 |
| Kidney         | 97089_at    | Folh1          | folate hydrolase                                                                                                                                           | NM_016770 |

| Max Tissue      | Affy ID     | Symbol        | Description                                                                                                                                                    | AC        |
|-----------------|-------------|---------------|----------------------------------------------------------------------------------------------------------------------------------------------------------------|-----------|
| Thymus          | 100148_at   | none          | U51037:Mus musculus 11-zinc-finger transcription factor (CTCF) mRNA complete cds /cds=(306 2516) /gb=U51037 /gi=1256409 /ug=Mm.493 /len=3840 /STRA=for Unknown |           |
| Thymus          | 102334_at   | Dok2          | downstream of tyrosine kinase 2                                                                                                                                | NM_010071 |
| Thymus          | 102744_at   | Tcrg-V4       | T-cell receptor gamma, variable 4                                                                                                                              | NM_011558 |
| Thymus          | 102745_at   | Tcrg-V4       | T-cell receptor gamma, variable 4                                                                                                                              | NM_011558 |
| Thymus          | 103279_at   | Sh2d1a        | SH2 domain protein 1A                                                                                                                                          | NM_011364 |
| Thymus          | 94202_at    | Tcrb-V8.2     | T-cell receptor beta, variable 8.2                                                                                                                             | none      |
| Thymus          | 94726_at    | none          | Mus musculus T-cell receptor beta chain (TCRB) mRNA, partial cds                                                                                               | Mm.14128  |
| Thymus          | 98756_at    | 2810043O03Rik | RIKEN cDNA 2810043O03 gene                                                                                                                                     | none      |
| Thymus          | 98648_f_at  | Cd3d          | CD3 antigen, delta polypeptide                                                                                                                                 | NM_013487 |
| Thymus          | 101163_at   | Rag2          | recombination activating gene 2                                                                                                                                | NM_009020 |
| Stomach         | 93549_f_at  | Pla2g1b       | phospholipase A2, group IB, pancreas                                                                                                                           | NM_011107 |
| Stomach         | 99534_at    | Mtlrp-pending | motilin-related peptide                                                                                                                                        | NM_021488 |
| Stomach         | 100501_at   | Atp4b         | ATPase, H+/K+ transporting, beta polypeptide, gastric specific                                                                                                 | NM_009724 |
| Stomach         | 104493_at   | Nrp2          | neuropilin 2                                                                                                                                                   | none      |
| Stomach         | 92494_at    | Anxa10        | annexin A10                                                                                                                                                    | NM_011922 |
| Stomach         | 94765_at    | none          | ESTs                                                                                                                                                           | Mm.1627   |
| Stomach         | 101803_at   | Muc5ac        | mucin 5, subtypes A and C, tracheobronchial/gastric                                                                                                            | none      |
| Stomach         | 94586_f_at  | Upp           | uridine phosphorylase                                                                                                                                          | NM_009477 |
| Stomach         | 96442_at    | none          | Mus musculus adult male liver cDNA, RIKEN full-length enriched library, clone:1300015I21, full insert sequence                                                 | Mm.2607   |
| Stomach         | 101142_at   | Fzd6          | frizzled homolog 6 (Drosophila)                                                                                                                                | NM_008056 |
| Prostate        | 93817_at    | 1810020N21Rik | RIKEN cDNA 1810020N21 gene                                                                                                                                     | none      |
| Prostate        | 98022_at    | Pcsk7         | proprotein convertase subtilisin/kexin type 7                                                                                                                  | NM_008794 |
| Prostate        | 93873_s_at  | Hoxa11s       | homeo box A11, opposite strand transcript                                                                                                                      | none      |
| Prostate        | 98842_at    | Svp5          | seminal vesicle protein 5                                                                                                                                      | NM_009301 |
| Prostate        | 102589_f_at | none          | AV299547:AV299547 Mus musculus cDNA 3 end /clone=5730469O06 /clone_end=3 /gb=AV299547 /gi=6332038 /ug=Mm.85656 /len=296 /STRA=rev Unknown                      |           |
| Prostate        | 94639_at    | Svs2          | seminal vesicle protein, secretion 2                                                                                                                           | NM_017390 |
| Prostate        | 98237_at    | none          | AV378993:AV378993 Mus musculus cDNA 3 end /clone=9230001G13 /clone_end=3 /gb=AV378993 /gi=6428002 /ug=Mm.91237 /len=250 /STRA=rev Unknown                      |           |
| Prostate        | 100689_at   | Svp2          | seminal vesicle protein 2                                                                                                                                      | none      |
| Small intestine | 96690_at    | 5033425B17Rik | RIKEN cDNA 5033425B17 gene                                                                                                                                     | none      |
| Small intestine | 104707_at   | 2010003F10Rik | RIKEN cDNA 2010003F10 gene                                                                                                                                     | none      |
| Small intestine | 98499_s_at  | Casp7         | caspace 7                                                                                                                                                      | NM_007611 |
| Small intestine | 104693_at   | 2600001M11Rik | RIKEN cDNA 2600001M11 gene                                                                                                                                     | none      |
| Small intestine | 98849_at    | D8Bwg1414e    | DNA segment, Chr 8, Brigham & Women's Genetics 1414 expressed                                                                                                  | none      |
| Small intestine | 95766_f_at  | Defcr16       | defensin related cryptdin 16                                                                                                                                   | none      |
| Small intestine | 101609_at   | 2010013B02Rik | RIKEN cDNA 2010013B02 gene                                                                                                                                     | none      |
| Small intestine | 101704_at   | Hnf4g         | hepatocyte nuclear factor 4, gamma                                                                                                                             | NM_013920 |
| Adrenal gland   | 92868_at    | none          | AF049890:Protein-tyrosine sulfotransferase 2 /cds=(156 1286) /gb=AF049890 /gi=3617843 /ug=Mm.14239 /len=1760 /STRA=for Unknown                                 |           |
| Adrenal gland   | 93091_s_at  | Fgfr2         | fibroblast growth factor receptor 2                                                                                                                            | NM_010207 |
| Adrenal gland   | 104672_at   | Sfrp3         | secreted frizzled-related sequence protein 3                                                                                                                   | NM_011356 |
| Adrenal gland   | 92192_s_at  | Pcsk5         | proprotein convertase subtilisin/kexin type 5                                                                                                                  | none      |
| Adrenal gland   | 95887_at    | none          | ESTs                                                                                                                                                           | Mm.23999  |
| Adrenal gland   | 98707_i_at  | none          | AV380611:AV380611 Mus musculus cDNA 3 end /clone=9230027G11 /clone_end=3 /gb=AV380611 /gi=6429688 /ug=Mm.92704 /len=241 /STRA=rev Unknown                      |           |
| Brown fat       | AFFX-CreX-3 | none          | X03453 Bacteriophage P1 cre recombinase protein (-5 and -3 represent transcript regions 5 prime and 3 prime respectively)  GenBank==X03453                     |           |

| Max Tissue      | Affy ID     | Symbol        | Description                                                                                                                                                                  | AC        |
|-----------------|-------------|---------------|------------------------------------------------------------------------------------------------------------------------------------------------------------------------------|-----------|
| Brown fat       | 94554_at    | 4021401A16Rik | RIKEN cDNA 4021401A16 gene                                                                                                                                                   | NM_025701 |
| Brown fat       | 101015_s_at | Ifnar2        | interferon (alpha and beta) receptor 2                                                                                                                                       | NM_010509 |
| Brown fat       | 96803_at    | 2310045H19Rik | RIKEN cDNA 2310045H19 gene                                                                                                                                                   | none      |
| Brown fat       | 104648_at   | none          | ESTs, Moderately similar to ALDEHYDE DEHYDROGENASE, CYTOSOLIC [Mus musculus]                                                                                                 | Mm.31392  |
| Brown fat       | 97042_r_at  | 1110003P10Rik | RIKEN cDNA 1110003P10 gene                                                                                                                                                   | none      |
| Cerebellum      | 104460_at   | Cacna1g       | calcium channel, voltage-dependent, T type, alpha 1G subunit                                                                                                                 | NM_009783 |
| Cerebellum      | 92939_at    | Gabra6        | gamma-aminobutyric acid (GABA-A) receptor, subunit alpha 6                                                                                                                   | NM_008068 |
| Cerebellum      | 95290_at    | Crhr          | corticotropin releasing hormone receptor                                                                                                                                     | NM_007762 |
| Cerebellum      | 95324_at    | none          | AF053471:Mus musculus plasma membrane Ca <sup>2+</sup> -ATPase 2 (Pmca2) mRNA complete cds /cds=(457 4053) /gb=AF053471 /gi=3642983 /ug=Mm.20441 /len=4300 /STRA=for Unknown |           |
| Cerebellum      | 98843_at    | Zic2          | zinc finger protein of the cerebellum 2                                                                                                                                      | NM_009574 |
| Cerebellum      | 99845_at    | Slc1a6        | solute carrier family 1, member 6                                                                                                                                            | NM_009200 |
| Lung            | 104146_at   | none          | AI853551:UI-M-BH0-ajd-g-10-0-UI.s1 Mus musculus cDNA 3 end /clone=UI-M-BH0-ajd-g-10-0-UI /clone_end=3 /gb=AI853551 /gi=5497457 /ug=Mm.22152 /len=431 /STRA=for Unknown       |           |
| Lung            | 99486_at    | Cenpb         | centromere autoantigen B                                                                                                                                                     | NM_007682 |
| Lung            | 100910_at   | none          | M14689:Mouse surfeit locus surfeit 3 protein gene /cds=(0 773) /gb=M14689 /gi=201081 /ug=Mm.58915 /len=774 /STRA=for Unknown                                                 |           |
| Lung            | 92289_at    | Ptprb         | protein tyrosine phosphatase, receptor type, B                                                                                                                               | none      |
| Lung            | 92337_g_at  | 1110018N15Rik | RIKEN cDNA 1110018N15 gene                                                                                                                                                   | none      |
| Skeletal muscle | 97213_at    | Fem1a         | feminization 1 a homolog (C. elegans)                                                                                                                                        | NM_010192 |
| Skeletal muscle | 104575_at   | 3110004L20Rik | RIKEN cDNA 3110004L20 gene                                                                                                                                                   | none      |
| Skeletal muscle | 99468_at    | Ptp4a3        | protein tyrosine phosphatase 4a3                                                                                                                                             | NM_008975 |
| Skeletal muscle | 102199_at   | 2610024N01Rik | RIKEN cDNA 2610024N01 gene                                                                                                                                                   | none      |
| Skeletal muscle | 100355_g_at | Tbx14         | T-box 14                                                                                                                                                                     | NM_011534 |
| Ovary           | 102266_at   | Inha          | inhibin alpha                                                                                                                                                                | NM_010564 |
| Ovary           | 102675_at   | Zp3           | zona pellucida glycoprotein 3                                                                                                                                                | NM_011776 |
| Ovary           | 103545_at   | none          | AA240695:mw17c06.r1 Mus musculus cDNA 5 end /clone=IMAGE-670954 /clone_end=5 /gb=AA240695 /gi=1865252 /ug=Mm.23678 /len=275 /STRA=for Unknown                                |           |
| Ovary           | 94648_f_at  | none          | AV207739:AV207739 Mus musculus cDNA 3 end /clone=1700096L15 /clone_end=3 /gb=AV207739 /gi=6148592 /ug=Mm.59264 /len=223 /STRA=rev Unknown                                    |           |
| Heart           | 103084_at   | Csrp3         | cysteine-rich protein 3                                                                                                                                                      | NM_013808 |
| Heart           | 102944_at   | none          | ESTs                                                                                                                                                                         | Mm.1725   |
| Heart           | 97777_at    | Nkx2-5        | NK2 transcription factor related, locus 5 (Drosophila)                                                                                                                       | NM_008700 |
| Heart           | 99331_at    | Apeg1         | aortic preferentially expressed gene 1                                                                                                                                       | NM_007463 |
| Umbilical cord  | 95083_at    | Igfbp3        | insulin-like growth factor binding protein 3                                                                                                                                 | NM_008343 |
| Umbilical cord  | 103039_at   | Itga5         | integrin alpha 5 (fibronectin receptor alpha)                                                                                                                                | NM_010577 |
| Umbilical cord  | 97942_g_at  | none          | Y12582:M.musculus mRNA for calpain-like protease /cds=(129 2054) /gb=Y12582 /gi=2239139 /ug=Mm.30290 /len=2069 /STRA=for Unknown                                             |           |
| Liver           | 98923_at    | none          | AI852608:UI-M-BH0-aiu-d-07-0-UI.s1 Mus musculus cDNA 3 end /clone=UI-M-BH0-aiu-d-07-0-UI /clone_end=3 /gb=AI852608 /gi=5496514 /ug=Mm.28630 /len=273 /STRA=for Unknown       |           |
| Liver           | 101862_at   | Cyp2b9        | cytochrome P450, 2b9, phenobarbital inducible, type a                                                                                                                        | NM_010000 |
| Liver           | 94797_at    | none          | ESTs, Moderately similar to SULFATE ANION TRANSPORTER 1 [Rattus norvegicus]                                                                                                  | Mm.18004  |
| Adipose tissue  | 93523_at    | Calr          | calreticulin                                                                                                                                                                 | NM_007591 |
| Adipose tissue  | 101473_at   | Nnmt          | nicotinamide N-methyltransferase                                                                                                                                             | NM_010924 |
| Spleen          | 95017_f_at  | 1810004D15Rik | RIKEN cDNA 1810004D15 gene                                                                                                                                                   | NM_023182 |

| Max Tissue      | Affy ID    | Symbol    | Description                                                                                                                                                                              | AC        |
|-----------------|------------|-----------|------------------------------------------------------------------------------------------------------------------------------------------------------------------------------------------|-----------|
| Spleen          | 93208_at   | none      | AE000665:Mus musculus TCR beta locus from bases 501860 to 700960 (section 3 of 3) of the complete sequence /cds=(0 740) /gb=AE000665 /gi=2358100 /ug=Mm.57001 /len=741 /STRA=for Unknown |           |
| Large intestine | 93881_i_at | Ttgn2     | trans-golgi network protein 2                                                                                                                                                            | NM_009444 |
| Large intestine | 100369_at  | Siat7f    | sialyltransferase 7 ((alpha-N-acetylneuraminyl 2,3-betagalactosyl-1,3)-N-acetyl galactosaminide alpha-2,6-sialyltransferase) F                                                           | NM_016973 |
| Digits          | 102690_at  | Cyp2b19   | cytochrome P450, 2b19                                                                                                                                                                    | NM_007814 |
| Epidermis       | 93871_at   | Il1rn     | interleukin 1 receptor antagonist                                                                                                                                                        | NM_031167 |
| Snout Epidermis | 93663_r_at | Zap70     | zeta-chain (TCR) associated protein kinase (70kD)                                                                                                                                        | NM_009539 |
| Lymph node      | 101870_at  | Igh-4     | immunoglobulin heavy chain 4 (serum IgG1)                                                                                                                                                | none      |
| Bladder         | 98559_at   | Smtn      | smoothelin                                                                                                                                                                               | NM_013870 |
| Uterus          | 101707_at  | Aldh1a2   | alcohol dehydrogenase family 1, subfamily A2                                                                                                                                             | NM_009022 |
| DRG             | 98665_f_at | D6Ert253e | DNA segment, Chr 6, ERATO Doi 253, expressed                                                                                                                                             | none      |
| Trigeminal      | 97106_at   | Map3k8    | mitogen activated protein kinase kinase kinase 8                                                                                                                                         | NM_007746 |
| Olfactory bulb  | 98394_at   | Dlx1      | distal-less homeobox 1                                                                                                                                                                   | NM_010053 |
| Amygdala        | 94161_at   | Pkce      | protein kinase C, epsilon                                                                                                                                                                | NM_011104 |
| Hypothalamus    | 93381_at   | Avp       | arginine vasopressin                                                                                                                                                                     | NM_009732 |
